# Supplementary material
Source: PubMed Central journal article supplement (PMC6459056)
Supplement: nut102780st01.pdf [file nut102780st01.pdf]

## Online Supporting Material

Supplemental Table 1. Characteristics of children 12- and 17 mo old and their mothers, Vietnam<sup>1</sup>

| Characteristic                                        | Percent    |
|-------------------------------------------------------|------------|
| n                                                     | 91         |
| Mother's age (mean, sd)                               | 27.1 (4.5) |
| Mother's education                                    |            |
| Incomplete primary                                    | 3.4        |
| Completed primary                                     | 11.4       |
| Incomplete intermediate school                        | 37.5       |
| Completed intermediate school                         | 39.8       |
| Completed secondary school                            | 8.0        |
| Mother can read                                       | 97.7       |
| Mother can write                                      | 98.9       |
| Number of living children < 5 y old                   |            |
| 1                                                     | 63.6       |
| 2                                                     | 34.1       |
| 3+                                                    | 2.2        |
| Self-reported living standard                         |            |
| Hungry/not enough food                                | 9.1        |
| Poor                                                  | 39.8       |
| Enough food                                           | 48.9       |
| Better off                                            | 2.3        |
| Interviewer's assessment of economic status of family |            |
| Starving/irregular feeding                            | 5.7        |
| Poor                                                  | 42.1       |
| "Middle"                                              | 40.9       |
| Better off                                            | 11.4       |
| Sanitary facilities in house (yes)                    | 90.9       |
| Roof construction                                     |            |
| Hay/palm (less expensive)                             | 47.7       |
| Brick/tile/concrete (more expensive)                  | 52.3       |
| Floor construction                                    |            |
| Dirt (least expensive)                                | 52.3       |
| Cement/brick                                          | 44.3       |
| Wood/ceramic/tile (most expensive)                    | 3.4        |

<sup>1</sup> Values are percents unless otherwise noted.
